# Supplementary material
Source: Research Square preprint supplement (doi:10.21203/rs.3.rs-9994402/v1)
Supplement: Supplementary file 1 [file 3e876768f2426632f5f25062.docx]

**Table S1** Variables with missing data.

| Variables | Missing number (%) |
| --- | --- |
| Age, years | 0 |
| Gender | 0 |
| Race | 0 |
| RBC, K/uL | 0 |
| WBC, K/uL | 0 |
| PLT, K/uL | 0 |
| Hb, g/L | 0 |
| PT, s | 5 (1.04%) |
| APTT, s | 6 (1.24%) |
| INR | 5 (1.04%) |
| Na+, mmol/L | 0 |
| K+, mmol/L | 0 |
| AG | 0 |
| SCr, mg/dL | 0 |
| BUN, mmol/L | 0 |
| ALB, mg/dL | 0 |
| BAR | 0 |
| SBP, mmHg | 0 |
| MAP, mmHg | 0 |
| HR, times/min | 0 |
| SpO2, % | 0 |
| Urine output, ml | 10 (2.07%) |
| HTN | 0 |
| DM | 0 |
| CHF | 0 |
| MI | 0 |
| AKI | 0 |
| AF | 0 |
| Malignant cancer | 0 |
| CCI | 0 |
| APSIII | 0 |
| OASIS | 0 |
| SOFA | 1(0.21%) |
| SAPSII | 0 |
| SIRS | 0 |
| GCS | 1(0.21%) |
| Dobutamine | 0 |
| Dopamine | 0 |
| Epinephrine | 0 |
| Norepinephrine | 0 |
| Vasopressin | 0 |
| Furosemide | 0 |
| Variables | Missing number (%) |
| Mannitol | 0 |
| CRRT | 0 |
| Ventilator | 0 |
| Clipping of aneurysm | 0 |

**Abbreviations:** RBC: red blood cell, WBC: white blood cell, PLT: platelet, Hb: Hemoglobin, PT: Prothrombin Time, APTT: Activated Partial Thromboplastin Time, INR: International Normalized Ratio, Na+: sodium, K+: potassium, AG: anion gap, SCr: serum creatinine, BUN: blood urea nitrogen, ALB: albumin, BAR: blood urea nitrogen to albumin ratio, SBP: systolic blood pressure, MAP: mean arterial pressure, Spo2: peripheral oxygen saturation, HTN: hypertension, DM: diabetes mellitus, CHF: congestive heart failure, MI: myocardial infarct, AKI: acute kidney injury, AF: atrial fibrillation, CCI: Charlson Comorbidity Index, APSIII: Acute Physiology Score III, OASIS: Oxford Acute Severity of ILLness Score, SOFA: the Sequential Organ-Failure Assessment, SAPSII: Simplified Acute Physiology Score II, SIRS: Systemic Inflammatory Response Syndrome, GCS: the Glasgow Coma Scale, CRRT: Continuous Renal Replacement Therapy

**Table S2** Baseline characteristics according to 30-day survival outcomes.

| Characteristic | ALL | Suvivor | Non-suvivor | P-value |
| --- | --- | --- | --- | --- |
|  | n=482 | n=343 | n=139 |  |
| Demographic |  |  |  |  |
| Age, years | 61.72 (46.57-76.87) | 60.59 (45.73-75.45) | 64.48 (48.92-80.04) | **0.01** |
| Gender |  |  |  | 0.434 |
| Male | 231 (47.9) | 160 (46.6) | 71 (51.1) |  |
| Female | 251 (52.1) | 183 (53.4) | 68 (48.9) |  |
| Race |  |  |  | **<0.001** |
| White | 278 (57.7) | 218 (63.6) | 60 (43.2) |  |
| Other | 204 (42.3) | 125 (36.4) | 9 (56.8) |  |
| Laboratory results |  |  |  |  |
| RBC, K/uL | 3.95 (3.20-4.70) | 3.99 (3.31-4.67) | 3.85 (2.95-4.75) | 0.059 |
| WBC, K/uL | 13.59 (6.70-20.48) | 12.77 (6.82-18.72) | 15.61 (7.12-24.10) | **<0.001** |
| PLT, K/uL | 218.05 (110.77-325.33) | 227.50 (122.63-332.37) | 194.71 (84.75-304.67) | **0.002** |
| Hb, g/L | 11.95 (9.78-14.12) | 12.09 (10.10-14.08) | 11.59 (9.07-14.11) | **0.02** |
| PT, s | 14.26 (7.98-20.54) | 13.51 (9.35-17.67) | 16.12 (6.66-25.58) | **<0.001** |
| APTT, s | 34.43 (13.16-55.70) | 32.37 (15.19-49.55) | 39.52 (11.09-67.95) | **0.001** |
| INR | 1.29 (0.69-1.89) | 1.22 (0.82-1.62) | 1.47 (0.57-2.37) | **<0.001** |
| Na+, mmol/L | 139.29 (134.70-143.88) | 139.35 (135.47-143.23) | 139.12 (133.13-145.11) | 0.618 |
| K+, mmol/L | 4.00 (3.28-4.72) | 3.95 (3.30-4.60) | 4.11 (3.25-4.97) | **0.029** |
| AG | 14.67 (10.76-18.58) | 14.06 (10.80-17.32) | 16.19 (11.33-21.05) | **<0.001** |
| SCr, mg/dL | 1.11 (0.12-2.10) | 0.99 (0.12-1.86) | 1.40 (0.20-2.60) | **<0.001** |
| BUN, mmol/L | 19.45 (3.94-34.96) | 16.89 (5.28-28.50) | 25.77 (4.61-46.93) | **<0.001** |
| ALB, mg/dL | 3.40 (2.77-4.03) | 3.47 (2.87-4.07) | 3.24 (2.56-3.92) | **<0.001** |
| BAR | 6.37 (-0.45-13.19) | 5.28 (0.59-9.97) | 9.06 (-0.82-18.94) | **<0.001** |
| Characteristic | ALL | Suvivor | Non-suvivor | P-value |
|  | n=482 | n=343 | n=139 |  |
| Vital signs |  |  |  |  |
| SBP, mmHg | 131.71 (107.42-156.00) | 132.94 (109.82-156.06) | 128.68 (101.88-155.48) | 0.081 |
| MAP, mmHg | 89.32 (70.76-107.88) | 90.23 (72.19-108.27) | 87.06 (67.38-106.74) | 0.089 |
| HR, times/min | 83.73 (64.98-102.48) | 82.54 (65.39-99.69) | 86.66 (64.64-108.68) | **0.029** |
| SpO2, % | 97.44 (93.99-100.89) | 97.45 (94.16-100.74) | 97.41 (93.60-101.22) | 0.917 |
| Urine output, ml | 2175.23 (838.49-3511.97) | 2137.63 (1038.36-3235.90) | 2268.03 (473.25-4062.81) | 0.332 |
| Comorbidities |  |  |  |  |
| HTN |  |  |  | 0.506 |
| No | 233 (48.3) | 162 (47.2) | 71 (51.1) |  |
| Yes | 249 (51.7) | 181 (52.8) | 68 (48.9) |  |
| DM |  |  |  | **0.022** |
| No | 390 (80.9) | 287 (83.7) | 103 (74.1) |  |
| Yes | 92 (19.1) | 56 (16.3) | 36 (25.9) |  |
| CHF |  |  |  | 0.175 |
| No | 429 (89.0) | 310 (90.4) | 119 (85.6) |  |
| Yes | 53 (11.0) | 33 (9.6) | 20 (14.4) |  |
| MI |  |  |  | 0.14 |
| No | 424 (88.0) | 307 (89.5) | 117 (84.2) |  |
| Yes | 58 (12.0) | 36 (10.5) | 22 (15.8) |  |
| AKI |  |  |  | 0.252 |
| No | 75 (15.6) | 58 (16.9) | 17 (12.2) |  |
| Yes | 407 (84.4) | 285 (83.1) | 122 (87.8) |  |
| AF |  |  |  | **0.007** |
| No | 389 (80.7) | 288 (84.0) | 101 (72.7) |  |
| Characteristic | ALL | Suvivor | Non-suvivor | P-value |
|  | n=482 | n=343 | n=139 |  |
| Yes | 93 (19.3) | 55 (16.0) | 38 (27.3) |  |
| Malignant cancer |  |  |  | 0.186 |
| No | 450 (93.4) | 324 (94.5) | 126 (90.6) |  |
| Yes | 32 (6.6) | 19 (5.5) | 13 (9.4) |  |
| CCI | 4.67 (1.98-7.36) | 4.35 (1.79-6.91) | 5.47 (2.63-8.31) | **<0.001** |
| Clinical severity scores |  |  |  |  |
| APSIII | 44.59 (21.74-67.44) | 40.01 (20.31-59.71) | 55.88 (29.85-81.91) | **<0.001** |
| OASIS | 33.28 (24.94-41.62) | 31.52 (23.45-39.59) | 37.61 (30.24-44.98) | **<0.001** |
| SOFA | 3.56 (0.59-6.53) | 2.98 (0.37-5.59) | 4.99 (1.68-8.30) | **<0.001** |
| SAPSII | 36.54 (22.37-50.71) | 33.34 (20.54-46.14) | 44.42 (30.07-58.77) | **<0.001** |
| SIRS | 2.70 (1.74-3.66) | 2.58 (1.62-3.54) | 3.00 (2.09-3.91) | **<0.001** |
| GCS | 14.27 (12.96-15.58) | 14.24 (12.94-15.54) | 14.32 (12.99-15.65) | 0.546 |
| Treatments |  |  |  |  |
| Dobutamine |  |  |  | 0.348 |
| No | 474 (98.3) | 339 (98.8) | 135 (97.1) |  |
| Yes | 8 (1.7) | 4 (1.2) | 4 (2.9) |  |
| Dopamine |  |  |  | 0.254 |
| No | 472 (97.9) | 338 (98.5) | 134 (96.4) |  |
| Yes | 10 (2.1) | 5 (1.5) | 5 (3.6) |  |
| Epinephrine |  |  |  | 0.181 |
| No | 456 (94.6) | 328 (95.6) | 128 (92.1) |  |
| Yes | 26 (5.4) | 15 (4.4) | 11 (7.9) |  |
| Norepinephrine |  |  |  | **<0.001** |
| No | 330 (68.5) | 253 (73.8) | 77 (55.4) |  |
| Characteristic | ALL | Suvivor | Non-suvivor | P-value |
|  | n=482 | n=343 | n=139 |  |
| Yes | 152 (31.5) | 90 (26.2) | 62 (44.6) |  |
| Vasopressin |  |  |  | **<0.001** |
| No | 402 (83.4) | 303 (88.3) | 99 (71.2) |  |
| Yes | 80 (16.6) | 40 (11.7) | 40 (28.8) |  |
| Furosemide |  |  |  | **0.022** |
| No | 290 (60.2) | 218 (63.6) | 72 (51.8) |  |
| Yes | 192 (39.8) | 125 (36.4) | 67 (48.2) |  |
| Mannitol |  |  |  | **0.004** |
| No | 403 (83.6) | 298 (86.9) | 105 (75.5) |  |
| Yes | 79 (16.4) | 45 (13.1) | 34 (24.5) |  |
| CRRT |  |  |  | 0.145 |
| No | 451 (93.6) | 325 (94.8) | 126 (90.6) |  |
| Yes | 31 (6.4) | 18 (5.2) | 13 (9.4) |  |
| Ventilator |  |  |  | 0.566 |
| No | 71 (14.7) | 48 (14.0) | 23 (16.5) |  |
| Yes | 411 (85.3) | 295 (86.0) | 116 (83.5) |  |
| Clipping of aneurysm |  |  |  | 0.357 |
| No | 468 (97.1) | 331 (96.5) | 137 (98.6) |  |
| Yes | 14 (2.9) | 12 (3.5) | 2 (1.4) |  |

**Abbreviations:** RBC: red blood cell, WBC: white blood cell, PLT: platelet, Hb: Hemoglobin, PT: Prothrombin Time, APTT: Activated Partial Thromboplastin Time, INR: International Normalized Ratio, Na+: sodium, K+: potassium, AG: anion gap, SCr: serum creatinine, BUN: blood urea nitrogen, ALB: albumin, BAR: blood urea nitrogen to albumin ratio, SBP: systolic blood pressure, MAP: mean arterial pressure, HR: heart rate, Spo2: peripheral oxygen saturation, HTN: hypertension, DM: diabetes mellitus, CHF: congestive heart failure, MI: myocardial infarct, AKI: acute kidney injury, AF: atrial fibrillation, CCI: Charlson Comorbidity Index, APSIII: Acute Physiology Score III, OASIS: Oxford Acute Severity of ILLness Score, SOFA: the Sequential Organ-Failure Assessment, SAPSII: Simplified Acute Physiology Score II, SIRS: Systemic Inflammatory Response Syndrome, GCS: the Glasgow Coma Scale, CRRT: Continuous Renal Replacement Therapy.

**Table S3** Baseline characteristics according to 90-day survival outcomes.

| Characteristic | ALL | Suvivor | Non-suvivor | P-value |
| --- | --- | --- | --- | --- |
|  | n=482 | n=312 | n=170 |  |
| Demographic |  |  |  |  |
| Age, years | 61.72 (46.57-76.87) | 59.99 (45.55-74.43) | 64.88 (48.94-80.82) | **0.001** |
| Gender |  |  |  | 0.442 |
| Male | 231 (47.9) | 145 (46.5) | 86 (50.6) |  |
| Female | 251 (52.1) | 167 (53.5) | 84 (49.4) |  |
| Race |  |  |  | **<0.001** |
| White | 278 (57.7) | 199 (63.8) | 79 (46.5) |  |
| Other | 204 (42.3) | 113 (36.2) | 91 (53.5) |  |
| Laboratory results |  |  |  |  |
| RBC, K/uL | 3.95 (3.20-4.70) | 4.03 (3.38-4.68) | 3.79 (2.91-4.67) | **0.001** |
| WBC, K/uL | 13.59 (6.70-20.48) | 12.74 (7.09-18.39) | 15.14 (6.62-23.66) | **<0.001** |
| PLT, K/uL | 218.05 (110.77-325.33) | 232.87 (130.51-335.23) | 190.85 (79.81-301.89) | **<0.001** |
| Hb, g/L | 11.95 (9.78-14.12) | 12.21 (10.29-14.13) | 11.46 (8.96-13.96) | **<0.001** |
| PT, s | 14.26 (7.98-20.54) | 13.30 (9.26-17.34) | 16.02 (7.23-24.81) | **<0.001** |
| APTT, s | 34.43 (13.16-55.70) | 32.26 (14.65-49.87) | 38.42 (12.12-64.72) | **0.002** |
| INR | 1.29 (0.69-1.89) | 1.20 (0.81-1.59) | 1.46 (0.63-2.29) | **<0.001** |
| Na+, mmol/L | 139.29 (134.70-143.88) | 139.40 (135.55-143.25) | 139.08 (133.38-144.78) | 0.459 |
| K+, mmol/L | 4.00 (3.28-4.72) | 3.95 (3.31-4.59) | 4.10 (3.27-4.93) | **0.029** |
| AG | 14.67 (10.76-18.58) | 13.95 (10.75-17.15) | 16.01 (11.33-20.69) | **<0.001** |
| SCr, mg/dL | 1.11 (0.12-2.10) | 0.94 (0.20-1.68) | 1.41 (0.12-2.70) | **<0.001** |
| BUN, mmol/L | 19.45 (3.94-34.96) | 16.18 (5.07-27.29) | 25.45 (5.41-45.49) | **<0.001** |
| ALB, mg/dL | 3.40 (2.77-4.03) | 3.49 (2.90-4.08) | 3.23 (2.56-3.90) | **<0.001** |
| BAR | 6.37 (-0.45-13.19) | 4.98 (0.70-9.26) | 8.92 (-0.50-18.34) | **<0.001** |
| Characteristic | ALL | Suvivor | Non-suvivor | P-value |
|  | n=482 | n=312 | n=170 |  |
| Vital signs |  |  |  |  |
| SBP, mmHg | 131.71 (107.42-156.00) | 133.32 (110.51-156.13) | 128.75 (102.16-155.34) | **0.048** |
| MAP, mmHg | 89.32 (70.76-107.88) | 90.48 (72.39-108.57) | 87.19 (67.92-106.46) | 0.063 |
| HR, times/min | 83.73 (64.98-102.48) | 81.52 (64.79-98.25) | 87.78 (66.33-109.23) | **<0.001** |
| SpO2, % | 97.44 (93.99-100.89) | 97.46 (94.10-100.82) | 97.40 (93.79-101.01) | 0.867 |
| Urine output, ml | 2175.23 (838.49-3511.97) | 2198.79 (1104.61-3292.97) | 2131.99 (435.06-3828.92) | 0.601 |
| Comorbidities |  |  |  |  |
| HTN |  |  |  |  |
| No | 233 (48.3) | 144 (46.2) | 89 (52.4) | 0.228 |
| Yes | 249 (51.7) | 168 (53.8) | 81 (47.6) |  |
| DM |  |  |  |  |
| No | 390 (80.9) | 261 (83.7) | 129 (75.9) | 0.051 |
| Yes | 92 (19.1) | 51 (16.3) | 41 (24.1) |  |
| CHF |  |  |  | **0.017** |
| No | 429 (89.0) | 286 (91.7) | 143 (84.1) |  |
| Yes | 53 (11.0) | 26 (8.3) | 27 (15.9) |  |
| MI |  |  |  | **0.018** |
| No | 424 (88.0) | 283 (90.7) | 141 (82.9) |  |
| Yes | 58 (12.0) | 29 (9.3) | 29 (17.1) |  |
| AKI |  |  |  | 0.067 |
| No | 75 (15.6) | 56 (17.9) | 19 (11.2) |  |
| Yes | 407 (84.4) | 256 (82.1) | 151 (88.8) |  |
| AF |  |  |  | **<0.001** |
| No | 389 (80.7) | 267 (85.6) | 122 (71.8) |  |
| Characteristic | ALL | Suvivor | Non-suvivor | P-value |
|  | n=482 | n=343 | n=139 |  |
| Yes | 93 (19.3) | 45 (14.4) | 48 (28.2) |  |
| Malignant cancer |  |  |  | 0.107 |
| No | 450 (93.4) | 296 (94.9) | 154 (90.6) |  |
| Yes | 32 (6.6) | 16 (5.1) | 16 (9.4) |  |
| CCI | 4.67 (1.98-7.36) | 4.18 (1.70-6.66) | 5.58 (2.75-8.41) | **<0.001** |
| Clinical severity scores |  |  |  |  |
| APSIII | 44.59 (21.74-67.44) | 38.65 (20.33-56.97) | 55.49 (29.35-81.63) | **<0.001** |
| OASIS | 33.28 (24.94-41.62) | 31.18 (23.23-39.13) | 37.14 (29.51-44.77) | **<0.001** |
| SOFA | 3.56 (0.59-6.53) | 2.80 (0.42-5.18) | 4.95 (1.53-8.37) | **<0.001** |
| SAPSII | 36.54 (22.37-50.71) | 32.87 (20.35-45.39) | 43.26 (28.67-57.85) | **<0.001** |
| SIRS | 2.70 (1.74-3.66) | 2.54 (1.57-3.51) | 3.01 (2.13-3.89) | **<0.001** |
| GCS | 14.27 (12.96-15.58) | 14.26 (13.00-15.52) | 14.29 (12.89-15.69) | 0.817 |
| Treatments |  |  |  |  |
| Dobutamine |  |  |  | 0.613 |
| No | 474 (98.3) | 308 (98.7) | 166 (97.6) |  |
| Yes | 8 (1.7) | 4 (1.3) | 4 (2.4) |  |
| Dopamine |  |  |  | 0.254 |
| No | 472 (97.9) | 338 (98.5) | 134 (96.4) |  |
| Yes | 10 (2.1) | 5 (1.5) | 5 (3.6) |  |
| Epinephrine |  |  |  | 0.515 |
| No | 472 (97.9) | 307 (98.4) | 165 (97.1) |  |
| Yes | 10 (2.1) | 5 (1.6) | 5 (2.9) |  |
| Norepinephrine |  |  |  | **<0.001** |
| No | 330 (68.5) | 234 (75.0) | 96 (56.5) |  |
| Characteristic | ALL | Suvivor | Non-suvivor | P-value |
|  | n=482 | n=343 | n=139 |  |
| Yes | 152 (31.5) | 78 (25.0) | 74 (43.5) |  |
| Vasopressin |  |  |  | **<0.001** |
| No | 402 (83.4) | 278 (89.1) | 124 (72.9) |  |
| Yes | 80 (16.6) | 34 (10.9) | 46 (27.1) |  |
| Furosemide |  |  |  | **0.001** |
| No | 290 (60.2) | 206 (66.0) | 84 (49.4) |  |
| Yes | 192 (39.8) | 106 (34.0) | 86 (50.6) |  |
| Mannitol |  |  |  | 0.087 |
| No | 403 (83.6) | 268 (85.9) | 135 (79.4) |  |
| Yes | 79 (16.4) | 44 (14.1) | 35 (20.6) |  |
| CRRT |  |  |  | **<0.001** |
| No | 451 (93.6) | 304 (97.4) | 147 (86.5) |  |
| Yes | 31 (6.4) | 8 (2.6) | 23 (13.5) |  |
| Ventilator |  |  |  | 0.667 |
| No | 71 (14.7) | 46 (14.7) | 25 (14.7) |  |
| Yes | 411 (85.3) | 266 (85.3) | 145 (85.3) |  |
| Clipping of aneurysm |  |  |  | 0.166 |
| No | 468 (97.1) | 300 (96.2) | 168 (98.8) |  |
| Yes | 14 (2.9) | 12 (3.8) | 2 (1.2) |  |

**Abbreviations:** RBC: red blood cell, WBC: white blood cell, PLT: platelet, Hb: Hemoglobin, PT: Prothrombin Time, APTT: Activated Partial Thromboplastin Time, INR: International Normalized Ratio, Na+: sodium, K+: potassium, AG: anion gap, SCr: serum creatinine, BUN: blood urea nitrogen, ALB: albumin, BAR: blood urea nitrogen to albumin ratio, SBP: systolic blood pressure, MAP: mean arterial pressure, HR: heart rate, Spo2: peripheral oxygen saturation, HTN: hypertension, DM: diabetes mellitus, CHF: congestive heart failure, MI: myocardial infarct, AKI: acute kidney injury, AF: atrial fibrillation, CCI: Charlson Comorbidity Index, APSIII: Acute Physiology Score III, OASIS: Oxford Acute Severity of ILLness Score, SOFA: the Sequential Organ-Failure Assessment, SAPSII: Simplified Acute Physiology Score II, SIRS: Systemic Inflammatory Response Syndrome, GCS: the Glasgow Coma Scale, CRRT: Continuous Renal Replacement Therapy.

**Table S4** Baseline characteristics according to 365-day survival outcomes.

| Characteristic | ALL | Suvivor | Non-suvivor | P-value |
| --- | --- | --- | --- | --- |
|  | n=482 | n=288 | n=194 |  |
| Demographic |  |  |  |  |
| Age, years | 61.72 (46.57-76.87) | 59.21 (45.03-73.39) | 65.43 (49.62-81.24) | **<0.001** |
| Gender |  |  |  | 0.225 |
| Male | 231 (47.9) | 131 (45.5) | 100 (51.5) |  |
| Female | 251 (52.1) | 157 (54.5) | 94 (48.5) |  |
| Race |  |  |  | **0.020** |
| White | 278 (57.7) | 179 (62.2) | 99 (51.0) |  |
| Other | 204 (42.3) | 109 (37.8) | 95 (49.0) |  |
| Laboratory results |  |  |  |  |
| RBC, K/uL | 3.95 (3.20-4.70) | 4.08 (3.47-4.69) | 3.75 (2.86-4.64) | **<0.001** |
| WBC, K/uL | 13.59 (6.70-20.48) | 12.85 (7.25-18.45) | 14.68 (6.34-23.02) | **0.004** |
| PLT, K/uL | 218.05 (110.77-325.33) | 236.92 (134.71-339.13) | 190.03 (81.26-298.80) | **<0.001** |
| Hb, g/L | 11.95 (9.78-14.12) | 12.34 (10.56-14.12) | 11.36 (8.83-13.89) | **<0.001** |
| PT, s | 14.26 (7.98-20.54) | 13.20 (9.18-17.22) | 15.84 (7.47-24.21) | **<0.001** |
| APTT, s | 34.43 (13.16-55.70) | 31.90 (15.11-48.69) | 38.19 (12.03-64.35) | **0.001** |
| INR | 1.29 (0.69-1.89) | 1.19 (0.80-1.58) | 1.45 (0.66-2.24) | **<0.001** |
| Na+, mmol/L | 139.29 (134.70-143.88) | 139.41 (135.53-143.29) | 139.10 (133.62-144.58) | 0.460 |
| K+, mmol/L | 4.00 (3.28-4.72) | 3.93 (3.31-4.55) | 4.10 (3.27-4.93) | **0.015** |
| AG | 14.67 (10.76-18.58) | 13.94 (10.77-17.11) | 15.75 (11.15-20.35) | **<0.001** |
| SCr, mg/dL | 1.11 (0.12-2.10) | 0.90 (0.36-1.44) | 1.42 (0.06-2.78) | **<0.001** |
| BUN, mmol/L | 19.45 (3.94-34.96) | 15.32 (6.79-23.85) | 25.59 (4.91-46.27) | **<0.001** |
| ALB, mg/dL | 3.40 (2.77-4.03) | 3.52 (2.93-4.11) | 3.24 (2.58-3.90) | **<0.001** |
| BAR | 6.37 (-0.45-13.19) | 4.65 (1.24-8.06) | 8.91 (-0.46-18.28) | **<0.001** |
| Characteristic | ALL | Suvivor | Non-suvivor | p-value |
|  | n=482 | n=288 | n=194 |  |
| Vital signs |  |  |  |  |
| SBP, mmHg | 131.71 (107.42-156.00) | 133.24 (110.85-155.63) | 129.44 (102.69-156.19) | 0.092 |
| MAP, mmHg | 89.32 (70.76-107.88) | 90.40 (72.48-108.32) | 87.71 (68.30-107.12) | 0.119 |
| HR, times/min | 83.73 (64.98-102.48) | 81.11 (64.46-97.76) | 87.61 (66.67-108.55) | **<0.001** |
| SpO2, % | 97.44 (93.99-100.89) | 97.42 (94.01-100.83) | 97.46 (93.96-100.96) | 0.883 |
| Urine output, ml | 2175.23 (838.49-3511.97) | 2215.10 (1123.13-3307.07) | 2116.04 (480.74-3751.34) | 0.426 |
| Comorbidities |  |  |  |  |
| HTN |  |  |  | 0.151 |
| No | 233 (48.3) | 131 (45.5) | 102 (52.6) |  |
| Yes | 249 (51.7) | 157 (54.5) | 92 (47.4) |  |
| DM |  |  |  | **0.013** |
| No | 390 (80.9) | 244 (84.7) | 146 (75.3) |  |
| Yes | 92 (19.1) | 44 (15.3) | 48 (24.7) |  |
| CHF |  |  |  | **<0.001** |
| No | 429 (89.0) | 269 (93.4) | 160 (82.5) |  |
| Yes | 53 (11.0) | 19 (6.6) | 34 (17.5) |  |
| MI |  |  |  | **0.02** |
| No | 424 (88.0) | 262 (91.0) | 162 (83.5) |  |
| Yes | 58 (12.0) | 26 (9.0) | 32 (16.5) |  |
| AKI |  |  |  | **0.013** |
| No | 75 (15.6) | 55 (19.1) | 20 (10.3) |  |
| Yes | 407 (84.4) | 233 (80.9) | 174 (89.7) |  |
| AF |  |  |  | **<0.001** |
| No | 389 (80.7) | 251 (87.2) | 138 (71.1) |  |
| Characteristic | ALL | Suvivor | Non-suvivor | p-value |
|  | n=482 | n=288 | n=194 |  |
| Yes | 93 (19.3) | 37 (12.8) | 56 (28.9) |  |
| Malignant cancer |  |  |  | **0.001** |
| No | 450 (93.4) | 278 (96.5) | 172 (88.7) |  |
| Yes | 32 (6.6) | 10 (3.5) | 22 (11.3) |  |
| CCI | 4.67 (1.98-7.36) | 3.93 (1.66-6.20) | 5.77 (2.87-8.67) | **<0.001** |
| Clinical severity scores |  |  |  |  |
| APSIII | 44.59 (21.74-67.44) | 37.67 (20.04-55.30) | 54.87 (29.16-80.58) | **<0.001** |
| OASIS | 33.28 (24.94-41.62) | 30.80 (22.99-38.61) | 36.96 (29.25-44.67) | **<0.001** |
| SOFA | 3.56 (0.59-6.53) | 2.68 (0.39-4.97) | 4.85 (1.48-8.22) | **<0.001** |
| SAPSII | 36.54 (22.37-50.71) | 32.27 (20.00-44.54) | 42.86 (28.39-57.33) | **<0.001** |
| SIRS | 2.70 (1.74-3.66) | 2.52 (1.56-3.48) | 2.96 (2.05-3.87) | **<0.001** |
| GCS | 14.27 (12.96-15.58) | 14.28 (13.04-15.52) | 14.25 (12.85-15.65) | 0.779 |
| Treatments |  |  |  |  |
| Dobutamine |  |  |  | 0.352 |
| No | 474 (98.3) | 285 (99.0) | 189 (97.4) |  |
| Yes | 8 (1.7) | 3 (1.0) | 5 (2.6) |  |
| Dopamine |  |  |  | 0.757 |
| No | 472 (97.9) | 283 (98.3) | 189 (97.4) |  |
| Yes | 10 (2.1) | 5 (1.7) | 5 (2.6) |  |
| Epinephrine |  |  |  | **0.038** |
| No | 456 (94.6) | 278 (96.5) | 178 (91.8) |  |
| Yes | 26 (5.4) | 10 (3.5) | 16 (8.2) |  |
| Norepinephrine |  |  |  | **<0.001** |
| No | 330 (68.5) | 220 (76.4) | 110 (56.7) |  |
| Characteristic | ALL | Suvivor | Non-suvivor | p-value |
|  | n=482 | n=288 | n=194 |  |
| Yes | 152 (31.5) | 68 (23.6) | 84 (43.3) |  |
| Vasopressin |  |  |  | **<0.001** |
| No | 402 (83.4) | 259 (89.9) | 143 (73.7) |  |
| Yes | 80 (16.6) | 29 (10.1) | 51 (26.3) |  |
| Furosemide |  |  |  | **<0.001** |
| No | 290 (60.2) | 195 (67.7) | 95 (49.0) |  |
| Yes | 192 (39.8) | 93 (32.3) | 99 (51.0) |  |
| Mannitol |  |  |  | 0.093 |
| No | 403 (83.6) | 248 (86.1) | 155 (79.9) |  |
| Yes | 79 (16.4) | 40 (13.9) | 39 (20.1) |  |
| CRRT |  |  |  | **<0.001** |
| No | 451 (93.6) | 282 (97.9) | 169 (87.1) |  |
| Yes | 31 (6.4) | 6 (2.1) | 25 (12.9) |  |
| Ventilator |  |  |  | 0.778 |
| No | 71 (14.7) | 44 (15.3) | 27 (13.9) |  |
| Yes | 411 (85.3) | 244 (84.7) | 167 (86.1) |  |
| Clipping of aneurysm |  |  |  | 0.238 |
| No | 468 (97.1) | 277 (96.2) | 191 (98.5) |  |
| Yes | 14 (2.9) | 11 (3.8) | 3 (1.5) |  |

**Abbreviations:** RBC: red blood cell, WBC: white blood cell, PLT: platelet, Hb: Hemoglobin, PT: Prothrombin Time, APTT: Activated Partial Thromboplastin Time, INR: International Normalized Ratio, Na+: sodium, K+: potassium, AG: anion gap, SCr: serum creatinine, BUN: blood urea nitrogen, ALB: albumin, BAR: blood urea nitrogen to albumin ratio, SBP: systolic blood pressure, MAP: mean arterial pressure, HR: heart rate, Spo2: peripheral oxygen saturation, HTN: hypertension, DM: diabetes mellitus, CHF: congestive heart failure, MI: myocardial infarct, AKI: acute kidney injury, AF: atrial fibrillation, CCI: Charlson Comorbidity Index, APSIII: Acute Physiology Score III, OASIS: Oxford Acute Severity of ILLness Score, SOFA: the Sequential Organ-Failure Assessment, SAPSII: Simplified Acute Physiology Score II, SIRS: Systemic Inflammatory Response Syndrome, GCS: the Glasgow Coma Scale, CRRT: Continuous Renal Replacement Therapy.

**Table S5** Performance evaluation of seven algorithmic models on the internal validation set.

| Model | AUC | 95% CI Lower | 95% CI Upper | Accuracy | Precision | Sensitivity | F1 score | Specificity |
| --- | --- | --- | --- | --- | --- | --- | --- | --- |
| **LR** | **0.848** | **0.810** | **0.886** | **0.813** | **0.725** | **0.532** | **0.613** | **0.922** |
| DT | 0.694 | 0.605 | 0.784 | 0.676 | 0.391 | 0.321 | 0.353 | 0.811 |
| R | 0.822 | 0.748 | 0.896 | 0.804 | 0.722 | 0.464 | 0.565 | 0.932 |
| LightGBm | 0.843 | 0.772 | 0.913 | 0.775 | 0.647 | 0.393 | 0.489 | 0.919 |
| XGBoost | 0.850 | 0.781 | 0.920 | 0.824 | 0.778 | 0.500 | 0.609 | 0.946 |
| SVM | 0.853 | 0.785 | 0.922 | 0.735 | 0.667 | 0.071 | 0.129 | 0.986 |
| ANN | 0.831 | 0.758 | 0.904 | 0.794 | 0.652 | 0.536 | 0.588 | 0.892 |

**Abbreviations:** LR: Logistic Regression, DT: Decision Tree, RF: Random Forest, XGBoost: Extreme Gradient Boosting, LightGBM: Light Gradient Boosting Machine, SVM: Support Vector Machine, ANN: Artificial Neural Network.
